# Supplementary material
Source: PubMed Central journal article supplement (PMC7906029)

**Figure S1. Summary of article selection**

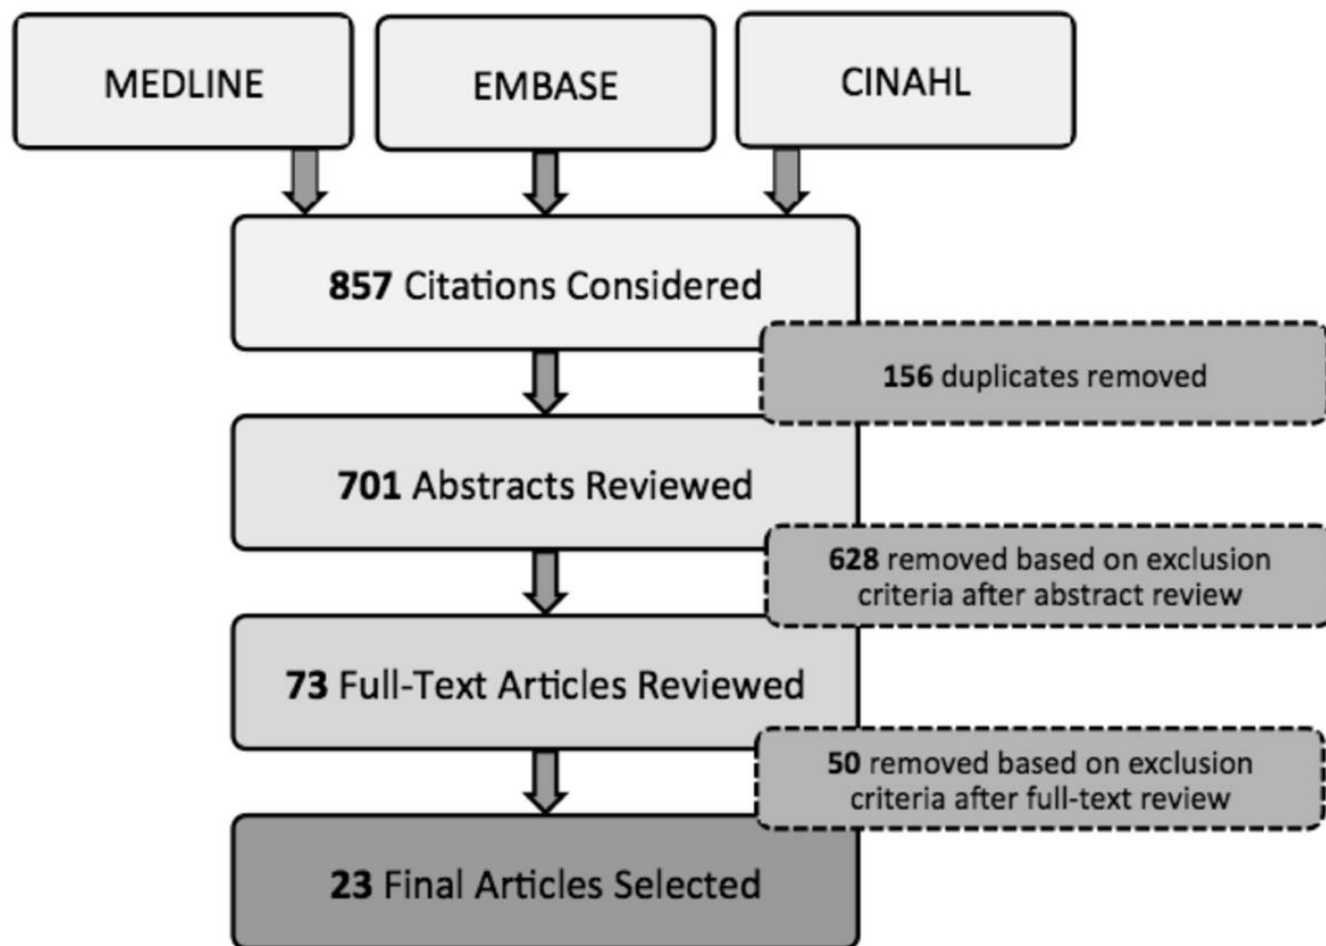

**Figure S2. Summary of main themes identifying barriers and facilitators to accessing health services for people with MS (PwMS)**

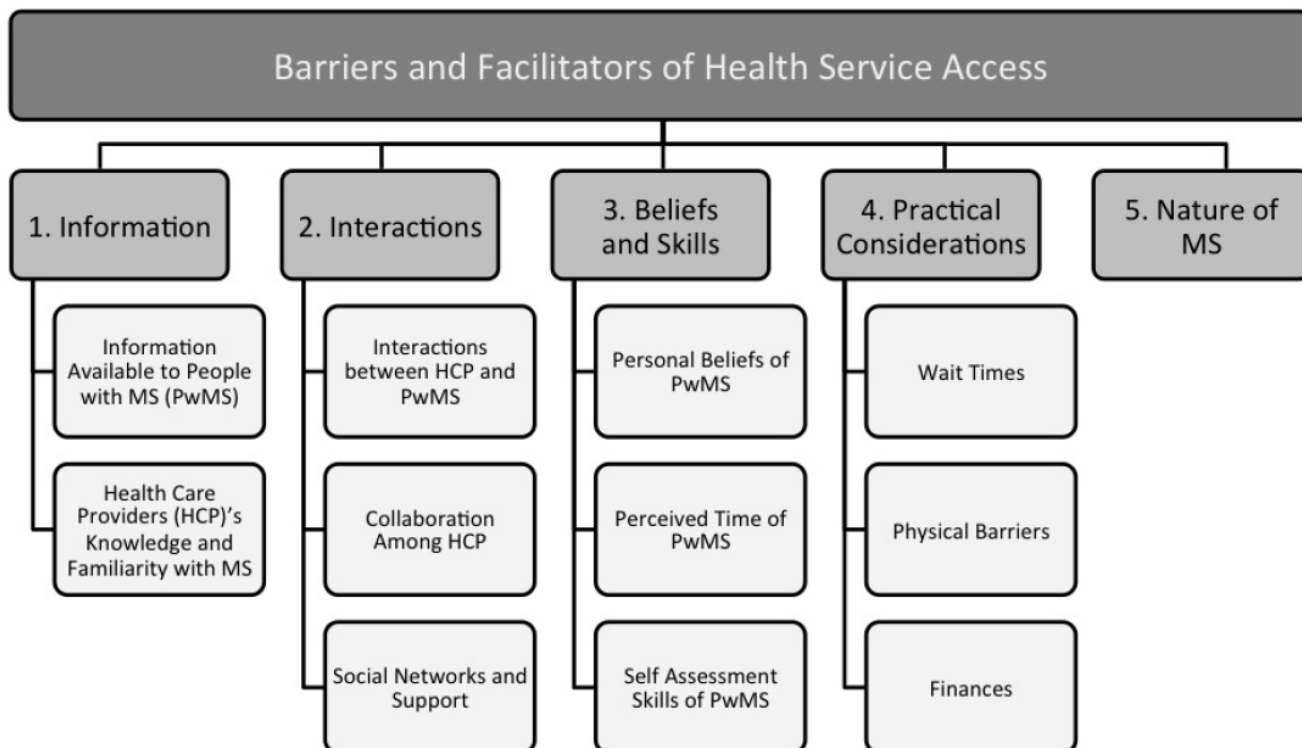

Supplement: i1537-2073-23-1-37_s01.pdf [file i1537-2073-23-1-37_s01.pdf]
